# Supplementary material for: Triptycene-derived macrotricyclic polyether containing an anthracene unit as a powerful host for 1,2-bis(pyridium)ethane, diquat and 2,7-diazapyrenium salt
Source: Royal Society of Chemistry journal article supplement (doi:10.1039/c4ob00310a), 2014-01-01
Supplement: c4ob00310a1.pdf [file c4ob00310a1.pdf]

## Electronic Supplementary Information

### **Triptycene-derived macrotricyclic polyether containing anthracene unit as a powerful host for 1,2-bis(pyridium)ethane, diquat and 2,7-diazapyrenium salt**

Ya-Kun Gu,<sup>a,b</sup> Fei Zeng,<sup>a,b</sup> Zheng Meng,<sup>a,b</sup> and Chuan-Feng Chen\*<sup>a</sup>

<sup>a</sup>Beijing National Laboratory for Molecular Sciences, CAS Key Laboratory of Molecular Recognition and Function, Institute of Chemistry, Chinese Academy of Sciences, Beijing 100190, China. <sup>b</sup>University of Chinese Academy of Sciences, Beijing 100049, China.

Email: cchen@iccas.ac.cn

### Contents

|                                                                                       |            |
|---------------------------------------------------------------------------------------|------------|
| <b>1. <sup>1</sup>H NMR titration experiments of the complexes</b>                    | <b>S2</b>  |
| <b>2. <sup>1</sup>H-<sup>1</sup>H COSY NMR spectra of the complexes</b>               | <b>S4</b>  |
| <b>3. Mole ratio plots for the host and the guests of the complexes</b>               | <b>S7</b>  |
| <b>4. ESI MS spectra of the complexes</b>                                             | <b>S8</b>  |
| <b>5. Crystal packing of the complexes</b>                                            | <b>S10</b> |
| <b>6. Crystal data of the complexes</b>                                               | <b>S11</b> |
| <b>7. Ellipsoid plot for crystal structures of the complexes</b>                      | <b>S14</b> |
| <b>8. K<sup>+</sup>-Ion-controlled binding and release of guests in the complexes</b> | <b>S17</b> |
| <b>9. Computational methods and coordinates for the guests</b>                        | <b>S19</b> |
| <b>10. References</b>                                                                 | <b>S22</b> |

## 1. $^1\text{H}$ NMR spectroscopic titrations of the complexes

**Binding studies by proton  $^1\text{H}$  NMR.** Since binding was a fast exchange process, the association constants were determined by titrating a solution ( $3.0 \times 10^{-3}$  M) of host **1** in  $\text{CD}_3\text{CN}/\text{CDCl}_3$  (1:1, v/v) with the increased amount of a solution (0.3 M in  $\text{CD}_3\text{CN}$ ) of guests **2a-2c**. Deuterated acetonitrile was used as the lock, and TMS was employed as the internal standard. Chemical shifts were reported in parts per million (ppm). Fitting of chemical shifts of proton  $\text{H}_1$  of **1** was performed a nonlinear regression algorithm using MATLAB.

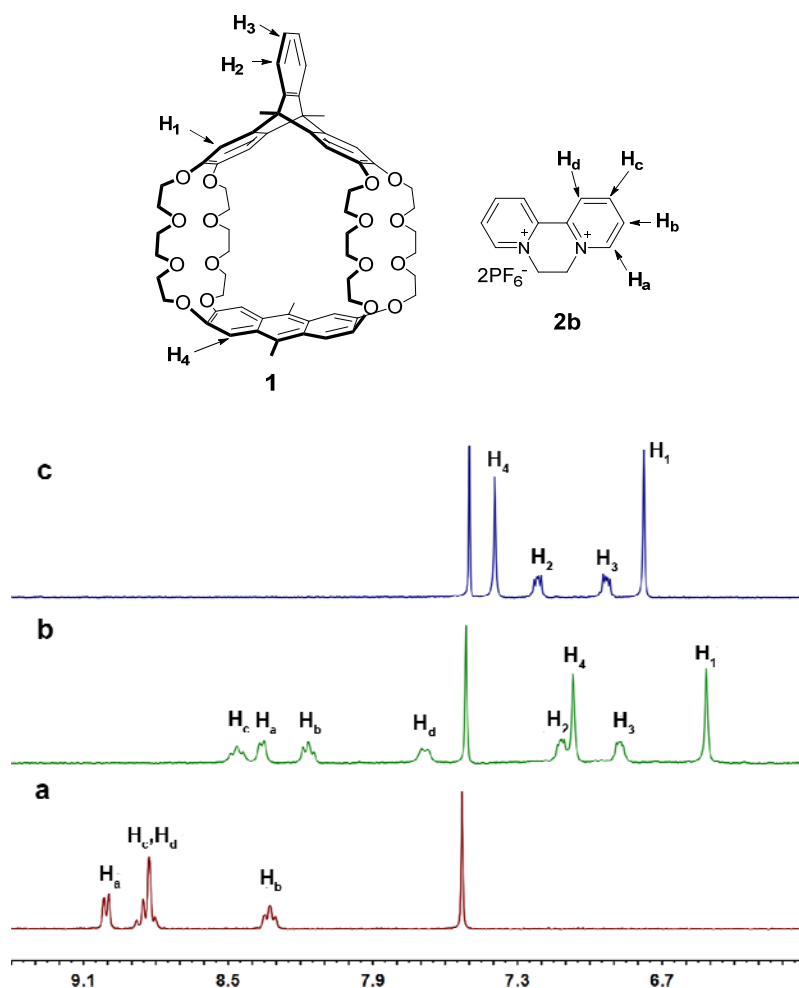

**Figure S1.** Partial  $^1\text{H}$  NMR spectra (300 MHz,  $\text{CD}_3\text{CN}/\text{CDCl}_3=1:1$ , v/v, 295K) of (a) free guest **2b**, (b) **1** and 1.0 equiv. of **2b**, and (c) free host **1**.  $[\text{H}]_0 = 3.0$  mM.

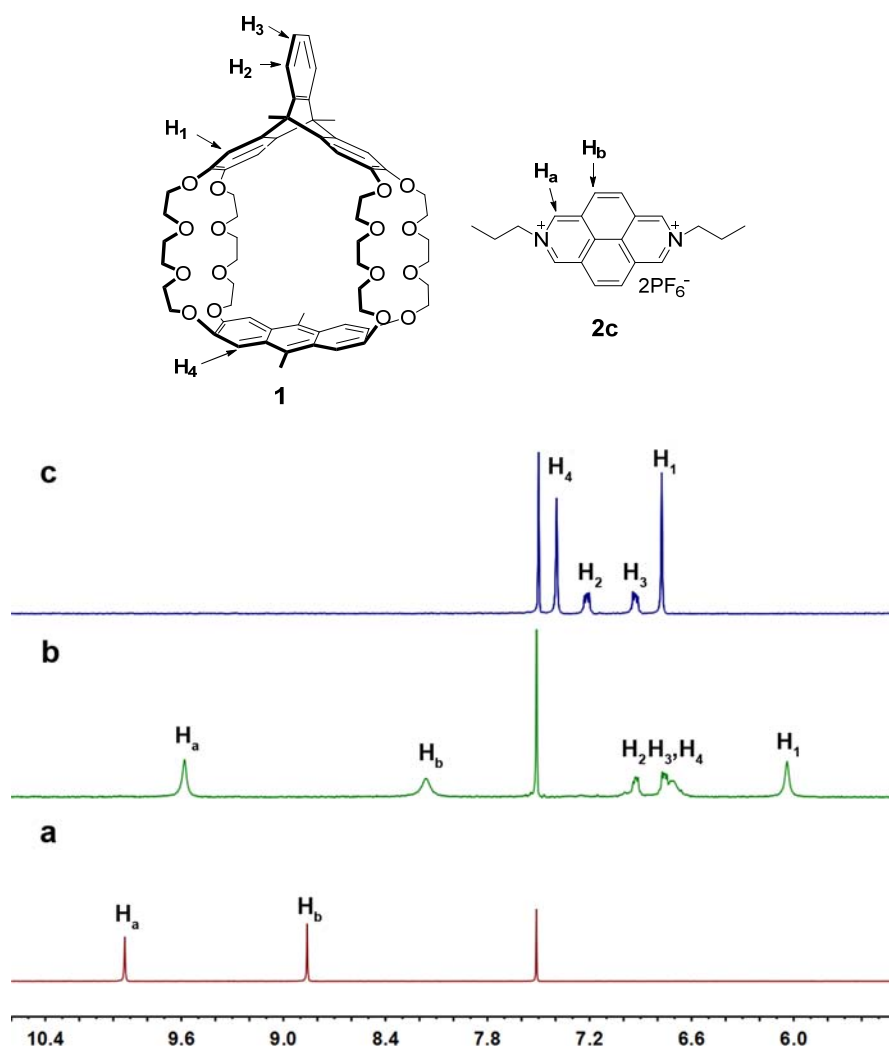

**Figure S2.** Partial  $^1\text{H}$  NMR spectra (300 MHz,  $\text{CD}_3\text{CN}/\text{CDCl}_3=1:1$ , v/v, 295K) of (a) free guest **2c**, (b) **1** and 1.0 equiv. of **2c**, and (c) free host **1**.  $[\mathbf{1}]_0 = 3.0$  mM.

## 2. $^1\text{H}$ - $^1\text{H}$ COSY NMR spectra of the complexes

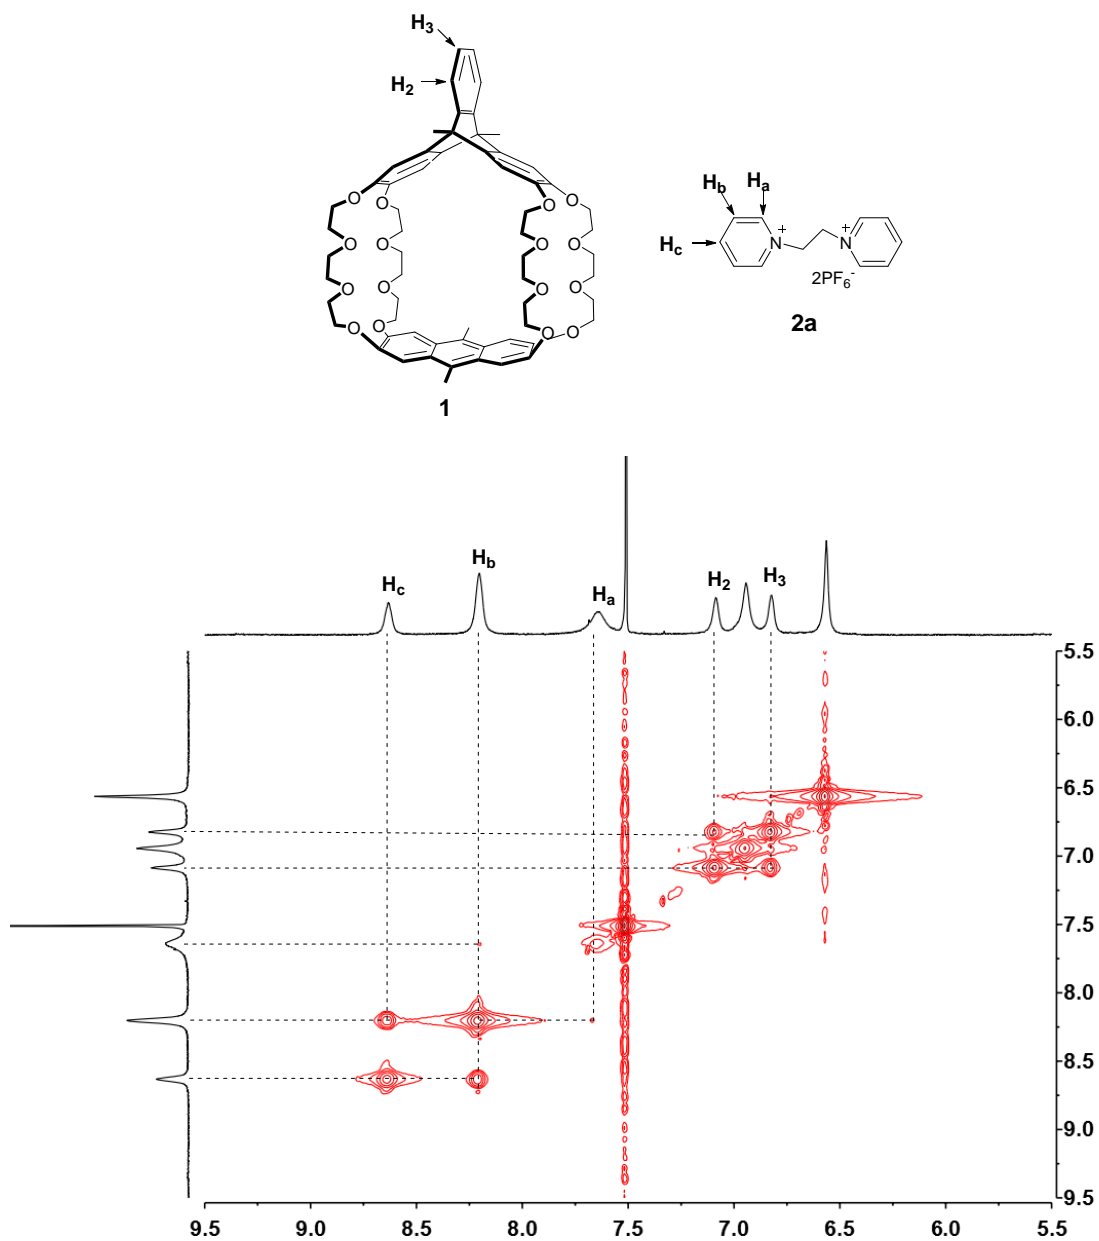

**Figure S3.**  $^1\text{H}$ - $^1\text{H}$  COSY spectrum (300 MHz,  $\text{CD}_3\text{CN}/\text{CDCl}_3=1:1$ , v/v, 295 K) of host **1** and 1.0 equiv. of **2a**.  $[1]_0 = 3.0$  mM.

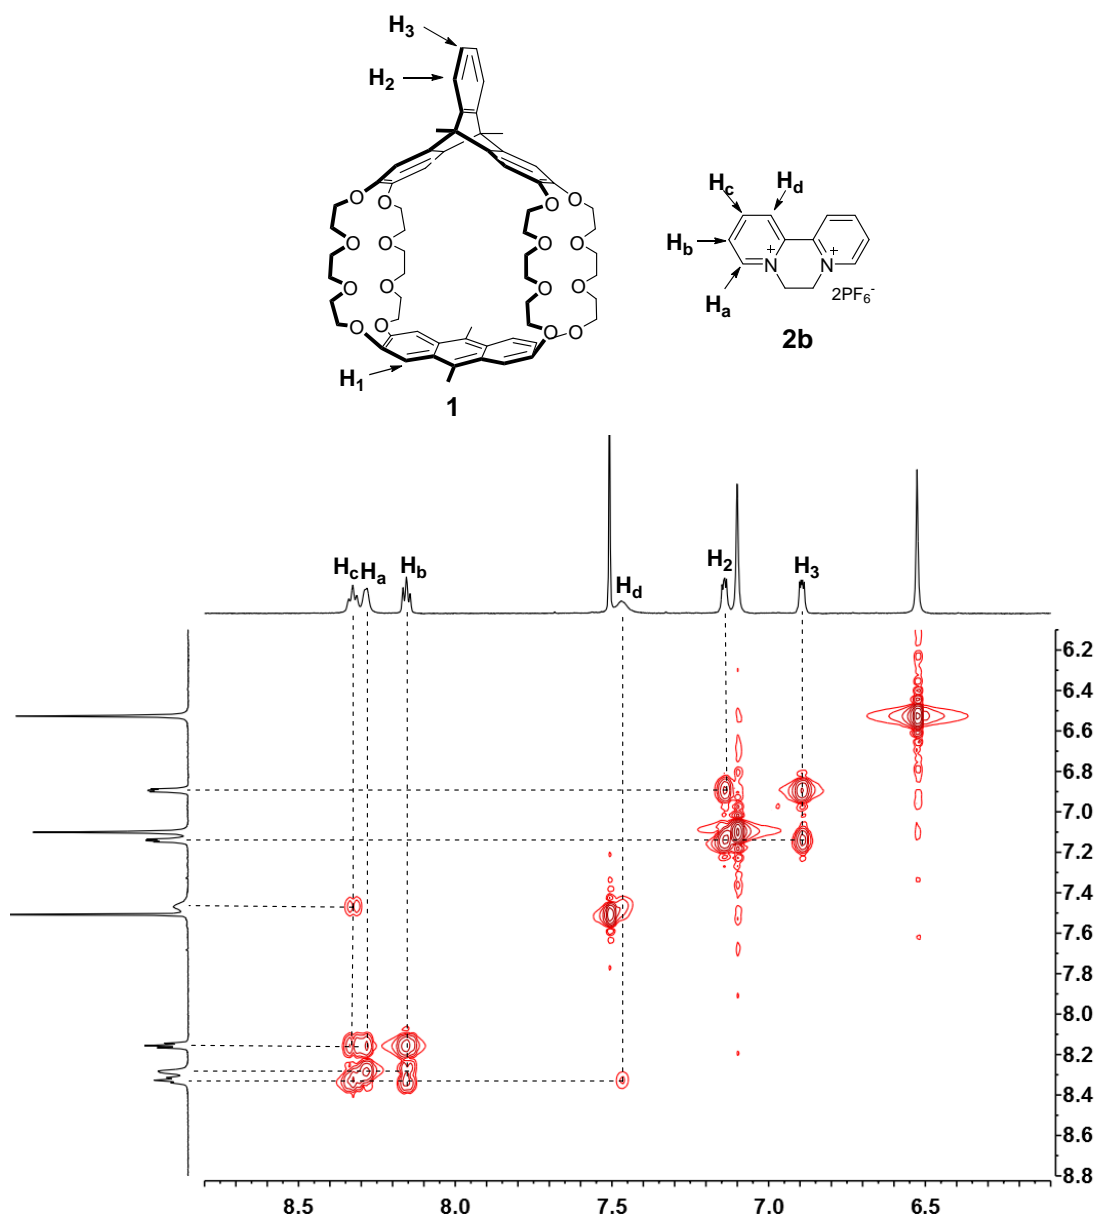

**Figure S4.**  $^1\text{H}$ - $^1\text{H}$  COSY spectrum (300 MHz,  $\text{CD}_3\text{CN}/\text{CDCl}_3=1:1$ , v/v, 295 K) of host **1** and 1.0 equiv. of **2b**.  $[1]_0 = 3.0$  mM.

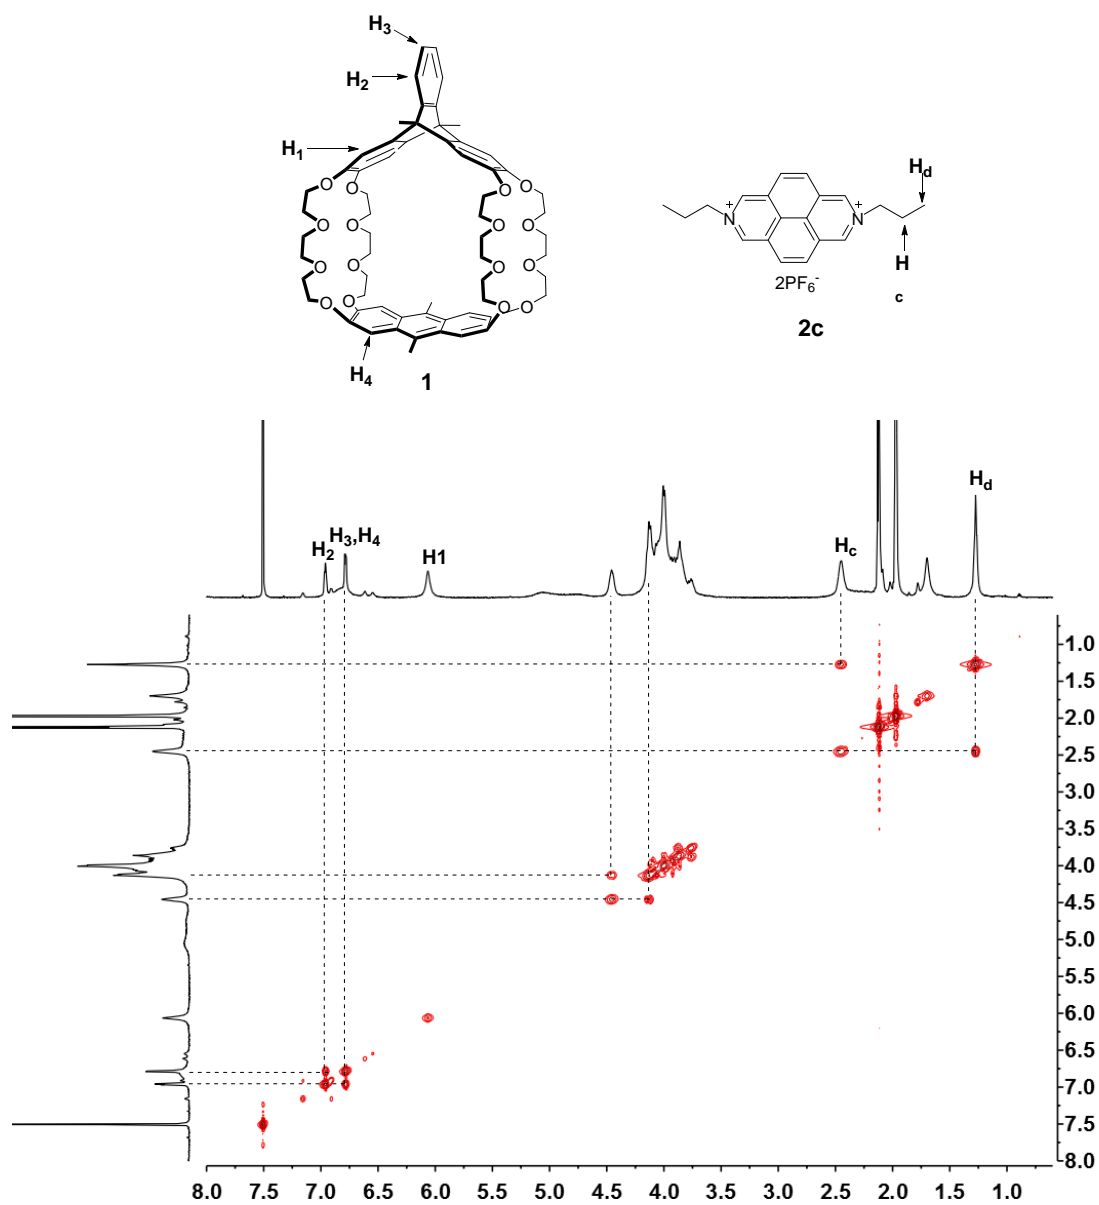

**Figure S5.**  $^1\text{H}$ - $^1\text{H}$  COSY spectrum (300 MHz,  $\text{CD}_3\text{CN}/\text{CDCl}_3=1:1$ , v/v, 295 K) of host **1** and 1.0 equiv. of **2c**.  $[1]_0 = 3.0$  mM.

### 3. Mole ratio between the host and the guests of the complexes

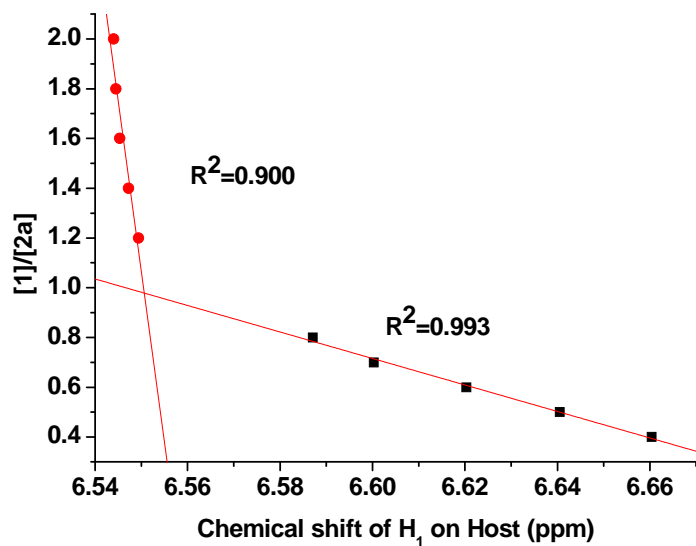

**Figure S6.** Mole ratio plot for the complexation between **1** and **2a** in  $CD_3CN/CDCl_3$  (1:1, v/v) at 295 K.  $[1]_0 = 3.0$  mM.

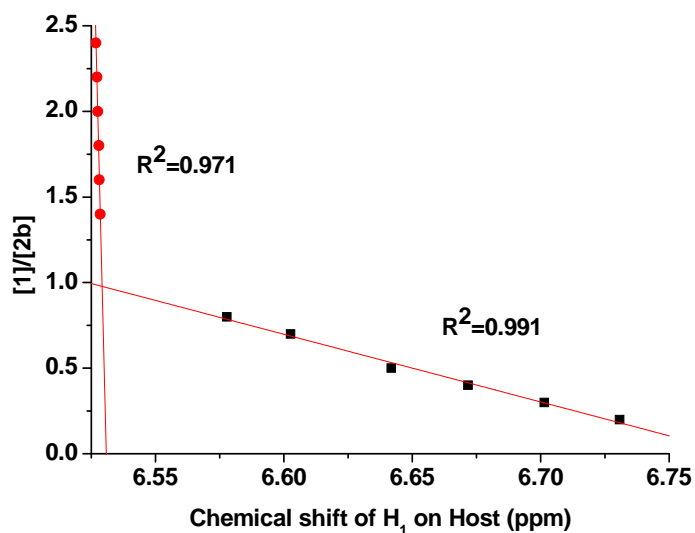

**Figure S7.** Mole ratio plot for the complexation between **1** and **2b** in  $CD_3CN/CDCl_3$  (1:1, v/v) at 295 K.  $[1]_0 = 3.0$  mM.

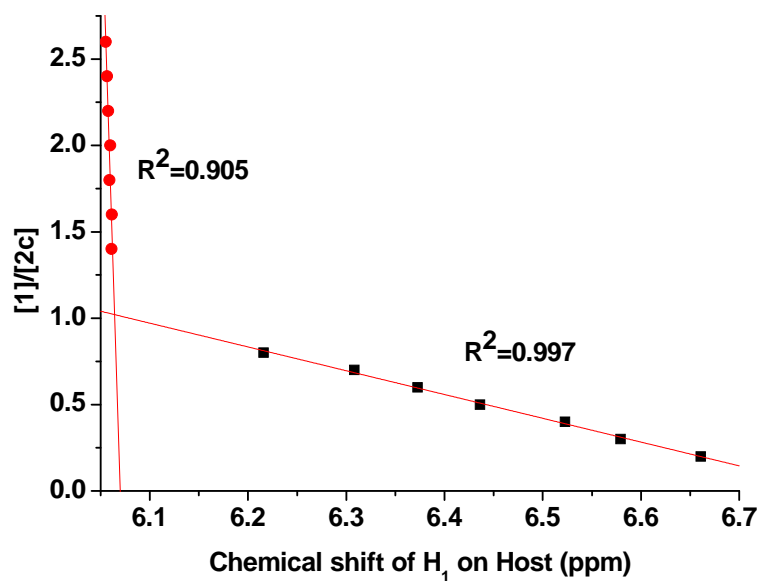

**Figure S8.** Mole ratio plot for the complexation between **1** and **2c** in  $\text{CD}_3\text{CN}/\text{CDCl}_3$  (1:1, v/v) at 295 K.  $[\mathbf{1}]_0 = 3.0$  mM.

#### 4. ESI MS spectra of the complexes

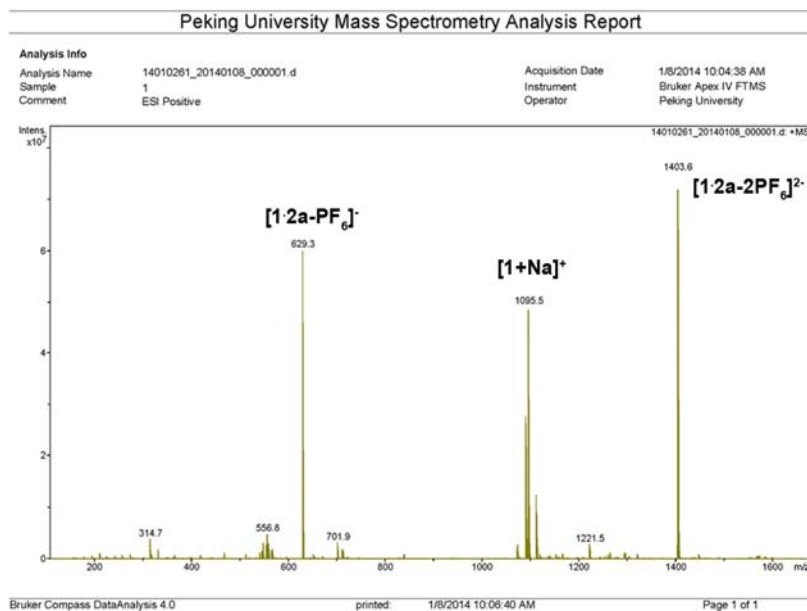

**Figure S9.** ESI MS of a solution of **1** and **2a** in acetonitrile-chloroform (1:1, v/v).



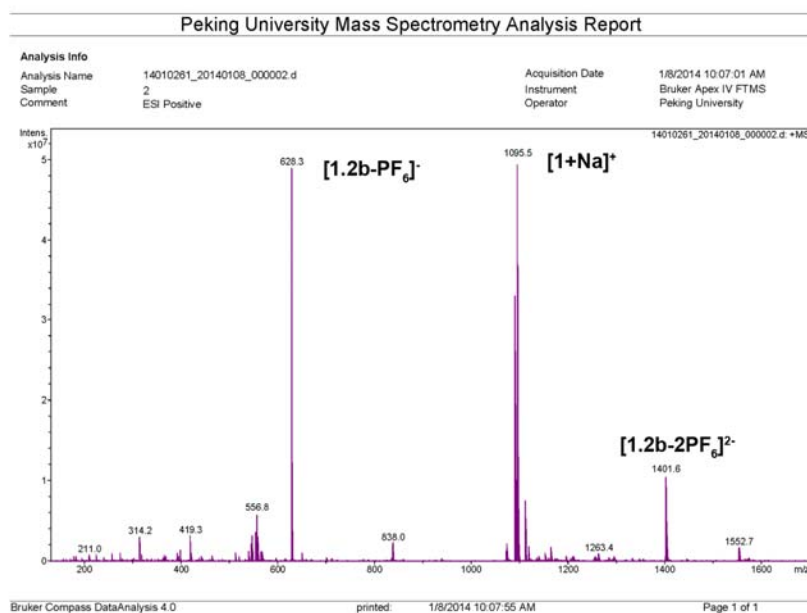

**Figure S10.** ESI MS of a solution of **1** and **2b** in acetonitrile-chloroform (1:1, v/v).

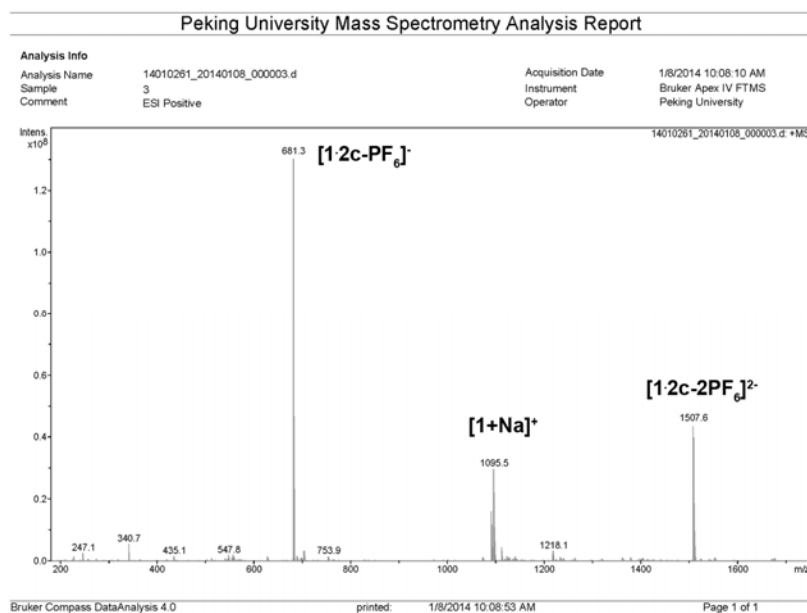

**Figure S11.** ESI MS of a solution of **1** and **2c** in acetonitrile-chloroform (1:1, v/v).

## 5. Crystal packing of the complexes

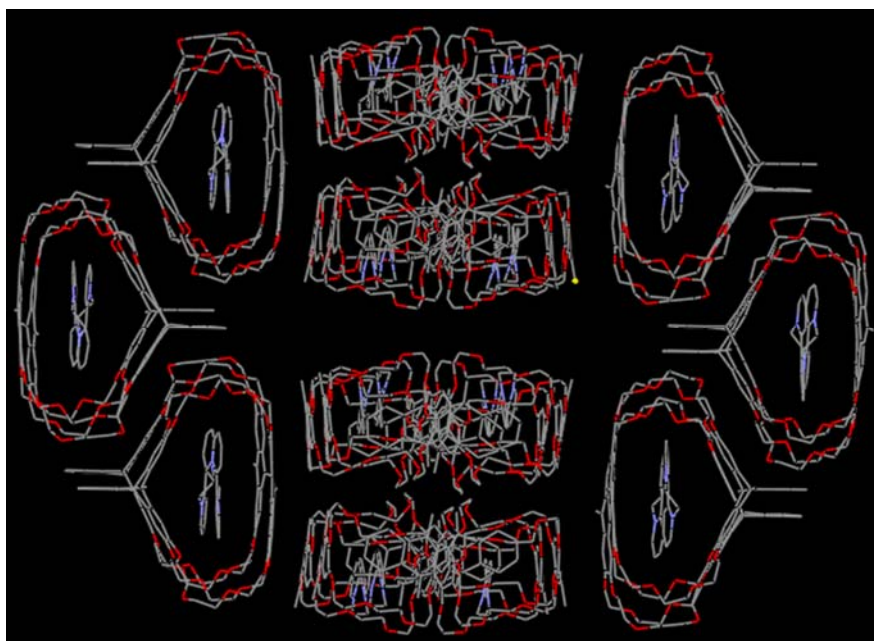

**Figure S12.** Crystal packing of complex **1·2b**.  $\text{PF}_6^-$  counterions and hydrogen atoms were omitted for clarity.

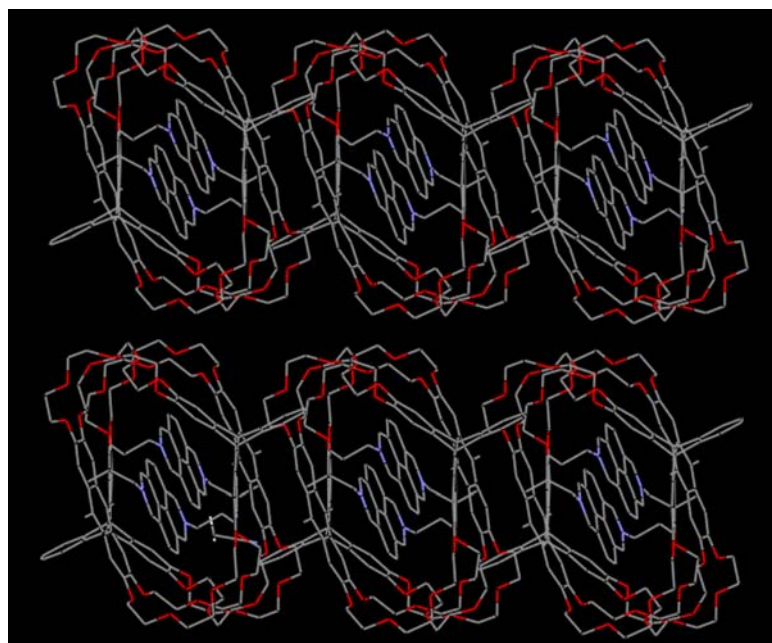

**Figure S13.** Crystal packing of complex **1·2c**. Solvent molecules,  $\text{PF}_6^-$  counterions and hydrogen atoms were omitted for clarity.

## 6. Structural parameters of the complexes

**Table S1.** Crystal data for **1·2a**

|                                                               |                                                                                                 |
|---------------------------------------------------------------|-------------------------------------------------------------------------------------------------|
| Empirical formula                                             | C <sub>158</sub> H <sub>187</sub> F <sub>24</sub> N <sub>9</sub> O <sub>32</sub> P <sub>4</sub> |
| Formula weight                                                | 3304.05                                                                                         |
| Crystal size (mm)                                             | 0.28 × 0.34 × 0.27                                                                              |
| Temperature (K)                                               | 173(2)                                                                                          |
| Wavelength (Å)                                                | 0.71073                                                                                         |
| Crystal system                                                | triclinic                                                                                       |
| Space group                                                   | <i>P</i> -1                                                                                     |
| <i>a</i> (Å)                                                  | 17.928(4)                                                                                       |
| <i>b</i> (Å)                                                  | 21.795(4)                                                                                       |
| <i>c</i> (Å)                                                  | 26.597(5)                                                                                       |
| $\alpha$ (°)                                                  | 68.93(3)                                                                                        |
| $\beta$ (°)                                                   | 79.43(3)                                                                                        |
| $\gamma$ (°)                                                  | 73.05(3)                                                                                        |
| <i>V</i> (Å <sup>3</sup> )                                    | 9240(3)                                                                                         |
| <i>Z</i>                                                      | 2                                                                                               |
| <i>D</i> <sub>calcd</sub> (g cm <sup>-3</sup> )               | 1.188                                                                                           |
| Absorption coefficient(mm <sup>-1</sup> )                     | 0.130                                                                                           |
| <i>F</i> (000)                                                | 3460                                                                                            |
| $\theta$ / (°)                                                | 1.38~ 27.48                                                                                     |
|                                                               | -23 $\leq$ h $\leq$ 22                                                                          |
| Limiting indices                                              | -27 $\leq$ k $\leq$ 28                                                                          |
|                                                               | -34 $\leq$ l $\leq$ 30                                                                          |
| Reflections collected / unique                                | 86969/41863 [R(int) = 0.0542]                                                                   |
| Data/restraints/parameters                                    | 41863/0/2056                                                                                    |
| Goodness of fit on <i>F</i> <sup>2</sup>                      | 1.293                                                                                           |
| <i>R</i> <sub>1</sub> , <i>wR</i> <sub>2</sub> [I > 2σ(I)]    | 0.0980, 0.2526                                                                                  |
| <i>R</i> <sub>1</sub> , <i>wR</i> <sub>2</sub> [all data]     | 0.1368, 0.2765                                                                                  |
| Largest diff. peak and hole (e <sup>-</sup> Å <sup>-3</sup> ) | 1.025 and -0.510                                                                                |

**Table S2.** Crystal data for **1·2b**

|                                                               |                                                                                                 |
|---------------------------------------------------------------|-------------------------------------------------------------------------------------------------|
| Empirical formula                                             | C <sub>148</sub> H <sub>166</sub> F <sub>24</sub> N <sub>4</sub> O <sub>32</sub> P <sub>4</sub> |
| Formula weight                                                | 3092.73                                                                                         |
| Crystal size (mm)                                             | 0.35 × 0.28 × 0.21                                                                              |
| Temperature (K)                                               | 173(2)                                                                                          |
| Wavelength (Å)                                                | 0.71073                                                                                         |
| Crystal system                                                | monoclinic                                                                                      |
| Space group                                                   | <i>C2/c</i>                                                                                     |
| <i>a</i> (Å)                                                  | 33.928(7)                                                                                       |
| <i>b</i> (Å)                                                  | 26.606(5)                                                                                       |
| <i>c</i> (Å)                                                  | 41.298(8)                                                                                       |
| $\alpha$ (°)                                                  | 90.00                                                                                           |
| $\beta$ (°)                                                   | 112.64(3)                                                                                       |
| $\gamma$ (°)                                                  | 90.00                                                                                           |
| <i>V</i> (Å <sup>3</sup> )                                    | 34407(12)                                                                                       |
| <i>Z</i>                                                      | 8                                                                                               |
| <i>D</i> <sub>calcd</sub> (g cm <sup>-3</sup> )               | 1.194                                                                                           |
| Absorption coefficient(mm <sup>-1</sup> )                     | 0.135                                                                                           |
| <i>F</i> (000)                                                | 12912                                                                                           |
| $\theta$ / (°)                                                | 1.00~ 26.34<br>-27 $\cong$ <i>h</i> $\cong$ 40                                                  |
| Limiting indices                                              | -30 $\cong$ <i>k</i> $\cong$ 31<br>-49 $\cong$ <i>l</i> $\cong$ 48                              |
| Reflections collected / unique                                | 68412/30084 [R(int) = 0.0827]                                                                   |
| Data/restraints/parameters                                    | 30084/85/1916                                                                                   |
| Goodness of fit on <i>F</i> <sup>2</sup>                      | 1.352                                                                                           |
| <i>R</i> <sub>1</sub> , <i>wR</i> <sub>2</sub> [I > 2σ(I)]    | 0.1200, 0.2932                                                                                  |
| <i>R</i> <sub>1</sub> , <i>wR</i> <sub>2</sub> [all data]     | 0.1696, 0.3159                                                                                  |
| Largest diff. peak and hole (e <sup>-</sup> Å <sup>-3</sup> ) | 1.942 and -0.563                                                                                |

**Table S3.** Crystal data for **1·2c**

|                                                               |                                                                                                |
|---------------------------------------------------------------|------------------------------------------------------------------------------------------------|
| Empirical formula                                             | C <sub>86</sub> H <sub>102</sub> F <sub>12</sub> N <sub>4</sub> O <sub>17</sub> P <sub>2</sub> |
| Formula weight                                                | 1753.66                                                                                        |
| Crystal size (mm)                                             | 0.46 × 0.31 × 0.23                                                                             |
| Temperature (K)                                               | 173(2)                                                                                         |
| Wavelength (Å)                                                | 0.71073                                                                                        |
| Crystal system                                                | triclinic                                                                                      |
| Space group                                                   | <i>P</i> -1                                                                                    |
| <i>a</i> (Å)                                                  | 12.547(2)                                                                                      |
| <i>b</i> (Å)                                                  | 16.146(3)                                                                                      |
| <i>c</i> (Å)                                                  | 21.955(4)                                                                                      |
| $\alpha$ (°)                                                  | 109.304(4)                                                                                     |
| $\beta$ (°)                                                   | 91.346(3)                                                                                      |
| $\gamma$ (°)                                                  | 91.789(3)                                                                                      |
| <i>V</i> (Å <sup>3</sup> )                                    | 4192.7(14)                                                                                     |
| <i>Z</i>                                                      | 2                                                                                              |
| <i>D</i> <sub>calcd</sub> (g cm <sup>-3</sup> )               | 1.389                                                                                          |
| Absorption coefficient(mm <sup>-1</sup> )                     | 0.149                                                                                          |
| <i>F</i> (000)                                                | 1840                                                                                           |
| $\theta$ / (°)                                                | 0.98~ 25.00<br>-14 $\cong$ <i>h</i> $\cong$ 14                                                 |
| Limiting indices                                              | -18 $\cong$ <i>k</i> $\cong$ 19<br>-26 $\cong$ <i>l</i> $\cong$ 26                             |
| Reflections collected / unique                                | 31625/14622 [R(int) = 0.0567]                                                                  |
| Params/ restraints                                            | 14622/51/1135                                                                                  |
| Goodness of fit on <i>F</i> <sup>2</sup>                      | 1.110                                                                                          |
| <i>R</i> <sub>1</sub> , <i>wR</i> <sub>2</sub> [I>2σ(I)]      | 0.1017, 0.2583                                                                                 |
| <i>R</i> <sub>1</sub> , <i>wR</i> <sub>2</sub> [all data]     | 0.1187, 0.2755                                                                                 |
| Largest diff. peak and hole (e <sup>-</sup> Å <sup>-3</sup> ) | 0.965 and -0.493                                                                               |

## 7. Ellipsoid plot for crystal structures of the complexes

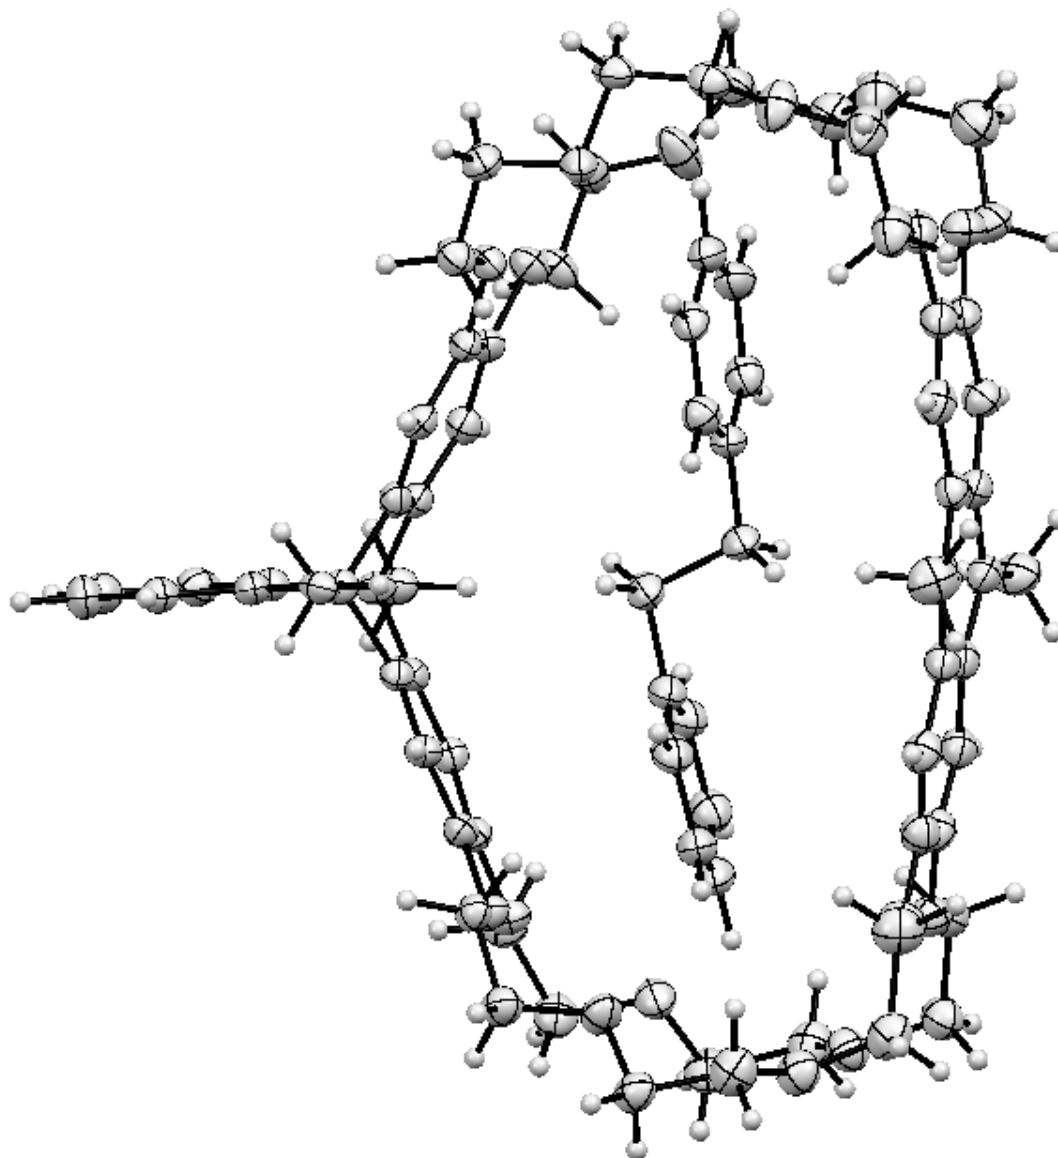

**Figure S14.** Ellipsoid plot for crystal structure of complex **1·2a** with probability level of 50%. Solvent molecules, and  $\text{PF}_6^-$  counterions were omitted for clarity.

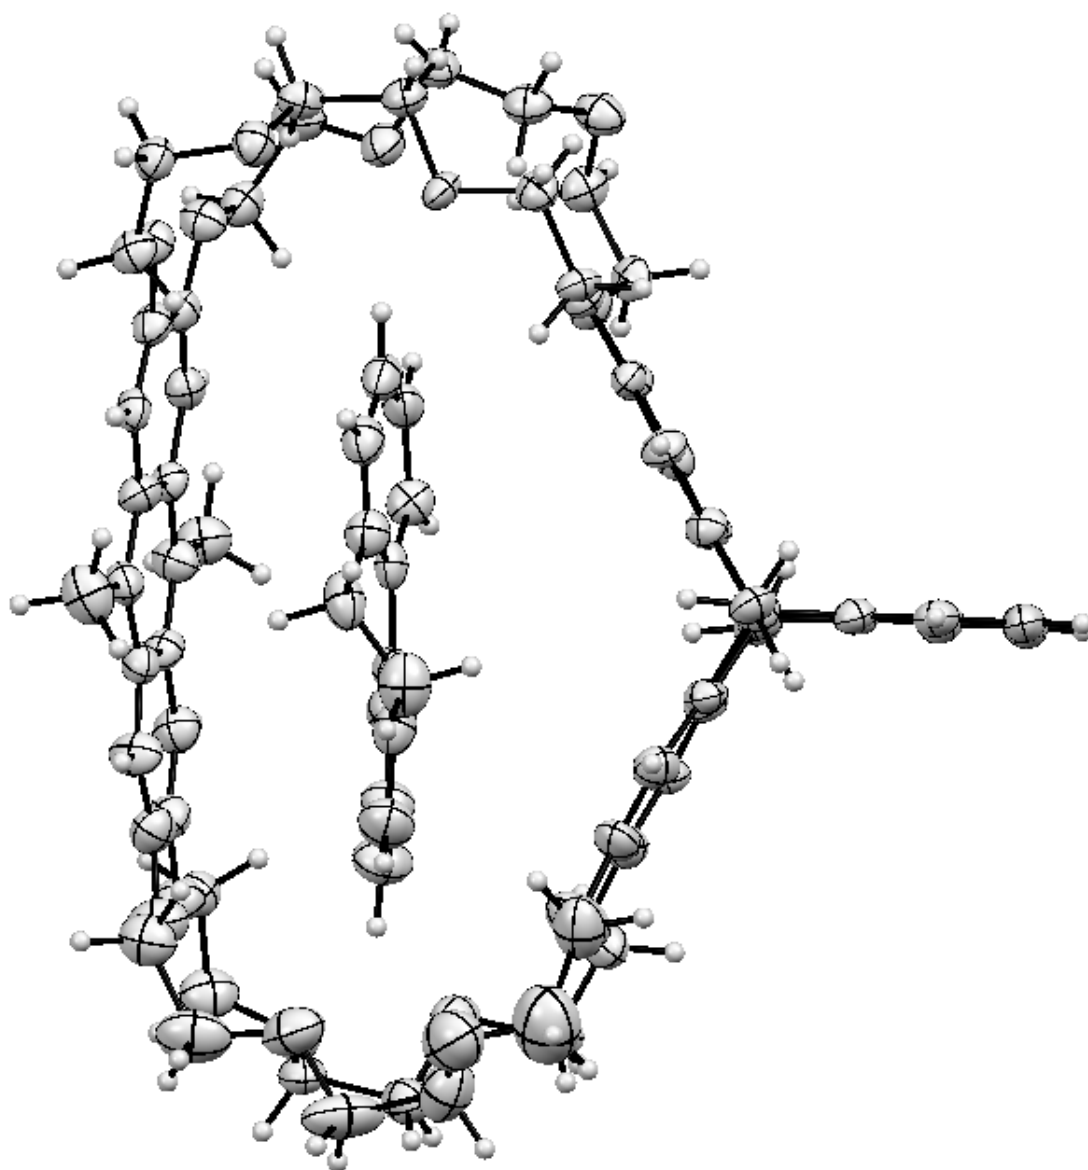

**Figure S15.** Ellipsoid plot for crystal structure of complex **1·2b** with probability level of 50%. Solvent molecules, and  $\text{PF}_6^-$  counterions were omitted for clarity.

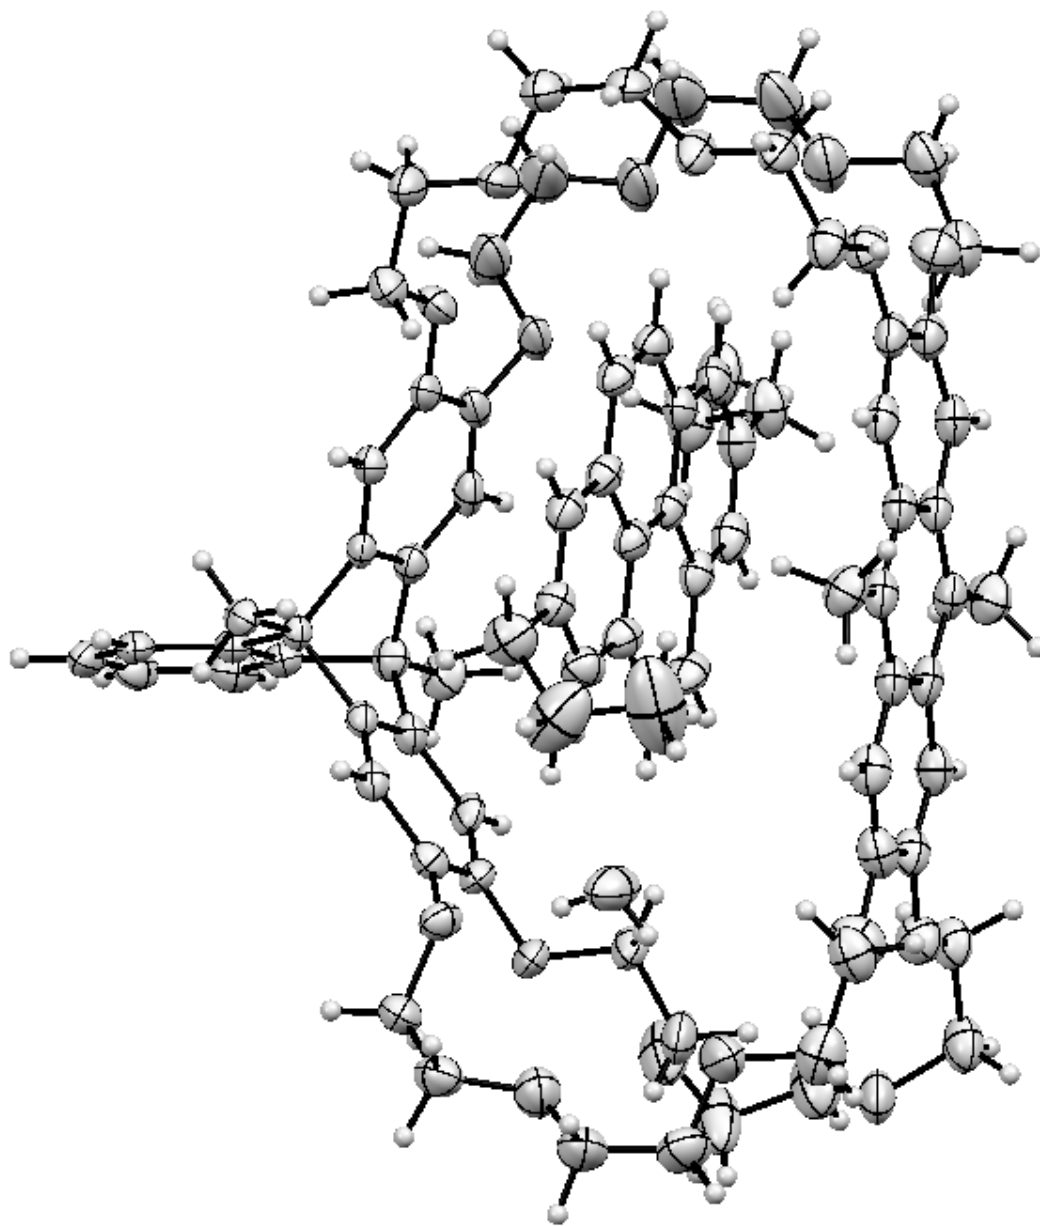

**Figure S16.** Ellipsoid plot for crystal structure of complex **1·2c** with probability level of 50%. Solvent molecules, and  $\text{PF}_6^-$  counterions were omitted for clarity.



## 8. K<sup>+</sup> Ion-controlled binding and release of guests in the complexes

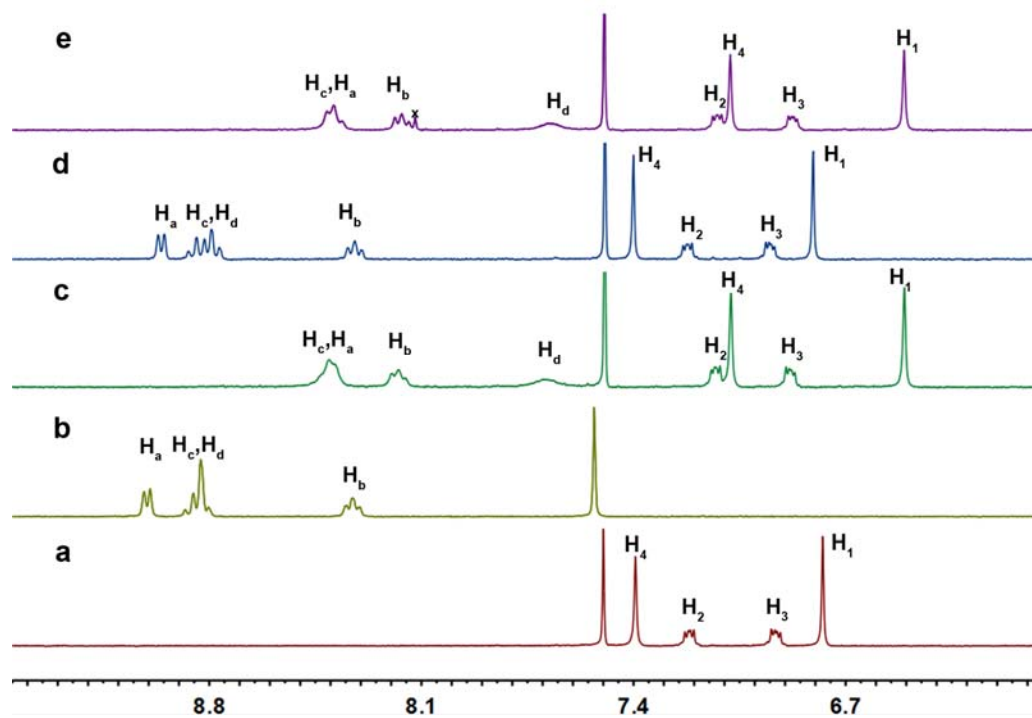

**Figure S17.** Partial <sup>1</sup>H NMR spectra (300 MHz, CD<sub>3</sub>CN/CDCl<sub>3</sub>= 1:1, v/v, 295K) of (a) free Host **1**, (b) free guest **2b**, (c) **1** and 1.0 equiv. of **2b**, (d) to the solution of c was added 4.0 equiv. of KPF<sub>6</sub>, and (e) to the solution of d was added 6.0 equiv. of [18]-crown-6. [**1**]<sub>0</sub>= 3.0 mM.

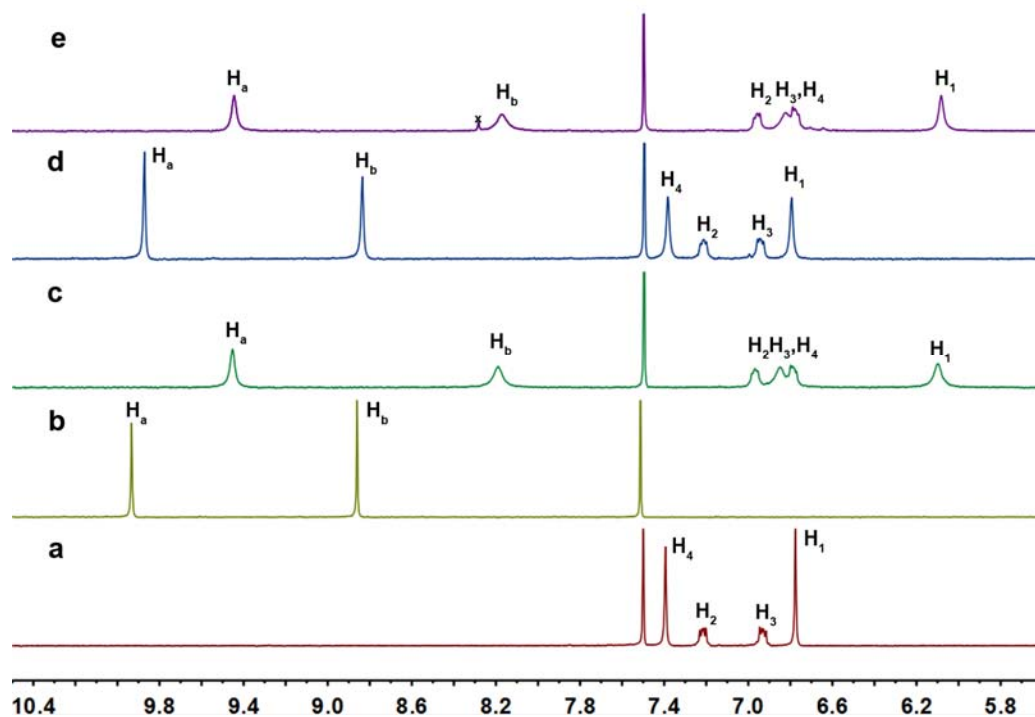

**Figure S18.** Partial <sup>1</sup>H NMR spectra (300 MHz, CD<sub>3</sub>CN/CDCl<sub>3</sub>= 1:1, v/v, 295K) of (a) free host **1**, (b) free guest **2c**, (c) **1** and 1.0 equiv. of **2c**, (d) to the solution of c was added 4.0 equiv. of KPF<sub>6</sub>, and (e) to the solution of d was added 6.0 equiv. of [18]-crown-6. [1]<sub>0</sub>= 3.0 mM.

## 9. Computational methods and coordinates for the guests

### Computational methods

All calculations were performed using the Gaussian 03 suite of programs.<sup>1</sup> Optimized gas-phase structures were obtained using the density functional theory (DFT) method B3LYP, a combination of Becke's three-parameter hybrid exchange functional,<sup>2-3</sup> as implemented<sup>4</sup> in Gaussian 03, and the correlation functional of Lee, Yang and Parr,<sup>5</sup> in conjunction with the 6-31G(d,p) basis set.

### Coordinates for guests 2a-2c

B3LYP/6-31G(d,p) optimized geometries (in Cartesian coordinate form) and their B3LYP/6-31G(d,p) electronic energies, enthalpies and free energies for the three guests are listed below for gas phase.

#### 1,2-bis(pyridium) ethane (BPE<sup>2+</sup>) (2a)

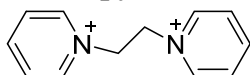

gas phase

B3LYP/6-31G(d,p)

SCF Energy (no zpe)= -574.423860 au; Energy + zpe (0K)= -574.412295 au

Enthalpy (298K)= -574.411351 au; Gibbs free energy (298K)= -574.463826 au

|   |              |              |              |
|---|--------------|--------------|--------------|
| C | -3.889554000 | -1.206552000 | -0.082394000 |
| C | -2.536838000 | -1.182333000 | 0.204582000  |
| C | -2.536732000 | 1.182278000  | 0.204957000  |
| C | -3.889439000 | 1.206707000  | -0.082005000 |
| C | -4.580514000 | 0.000129000  | -0.229684000 |
| H | -4.391792000 | -2.162613000 | -0.178598000 |
| H | -1.954396000 | -2.085098000 | 0.346328000  |
| H | -1.954200000 | 2.084936000  | 0.347000000  |
| H | -4.391606000 | 2.162835000  | -0.177905000 |
| H | -5.643736000 | 0.000221000  | -0.448396000 |
| C | -0.422587000 | -0.000193000 | 0.647714000  |
| C | 0.422421000  | -0.000044000 | -0.647466000 |
| H | -0.209054000 | -0.881614000 | 1.255907000  |
| H | -0.208960000 | 0.881043000  | 1.256143000  |
| H | 0.209152000  | -0.881362000 | -1.255892000 |
| H | 0.209069000  | 0.881380000  | -1.255708000 |
| C | 2.536753000  | -1.182305000 | -0.204591000 |
| C | 2.536775000  | 1.182329000  | -0.204896000 |
| C | 3.889522000  | -1.206597000 | 0.082208000  |

|   |              |              |              |
|---|--------------|--------------|--------------|
| H | 1.954215000  | -2.085007000 | -0.346299000 |
| C | 3.889543000  | 1.206660000  | 0.081888000  |
| C | 1.954248000  | 2.085002000  | -0.346826000 |
| C | 4.580563000  | 0.000043000  | 0.229459000  |
| H | 4.391737000  | -2.162683000 | 0.178319000  |
| H | 4.391789000  | 2.162756000  | 0.177748000  |
| H | 5.643807000  | 0.000070000  | 0.448042000  |
| N | -1.876957000 | -0.000084000 | 0.341248000  |
| N | 1.876992000  | -0.000002000 | -0.341033000 |

### Diquat (DQ<sup>2+</sup>) (2b)

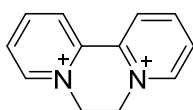

gas phase

B3LYP/6-31G(d,p)

SCF Energy (no zpe)= -573.217833 au; Energy + zpe (0K)= -573.208305 au

Enthalpy (298K)= -573.207360 au; Gibbs free energy (298K)= -573.253400 au

|   |              |              |              |
|---|--------------|--------------|--------------|
| C | -3.539594000 | -0.375401000 | 0.000010000  |
| C | -2.787666000 | 0.784058000  | -0.000127000 |
| C | -0.741012000 | -0.426109000 | 0.000040000  |
| C | -1.476493000 | -1.614739000 | 0.000216000  |
| C | -2.870030000 | -1.598966000 | 0.000204000  |
| C | -0.768274000 | 2.088344000  | -0.000236000 |
| C | 0.741012000  | -0.426109000 | -0.000031000 |
| C | 0.768274000  | 2.088344000  | 0.000260000  |
| C | 2.787666000  | 0.784058000  | 0.000111000  |
| H | 3.239625000  | 1.769807000  | 0.000234000  |
| C | 3.539594000  | -0.375401000 | -0.000030000 |
| C | 2.870030000  | -1.598966000 | -0.000210000 |
| C | 1.476493000  | -1.614739000 | -0.000209000 |
| H | -1.131619000 | 2.615046000  | -0.884775000 |
| H | -4.621976000 | -0.310082000 | -0.000021000 |
| H | -3.239625000 | 1.769807000  | -0.000256000 |
| H | -0.969841000 | -2.569135000 | 0.000384000  |
| H | -3.421278000 | -2.533917000 | 0.000345000  |
| H | 1.131618000  | 2.615031000  | 0.884808000  |
| H | 4.621976000  | -0.310082000 | -0.000013000 |
| H | 3.421278000  | -2.533917000 | -0.000351000 |
| H | 0.969841000  | -2.569135000 | -0.000368000 |

|   |              |             |              |
|---|--------------|-------------|--------------|
| N | -1.429489000 | 0.752813000 | -0.000095000 |
| N | 1.429489000  | 0.752813000 | 0.000096000  |
| H | 1.132134000  | 2.615485000 | -0.883805000 |
| H | -1.132133000 | 2.615469000 | 0.883838000  |

### 2,7-diazapyrenium (DAP<sup>2+</sup>) (2c)

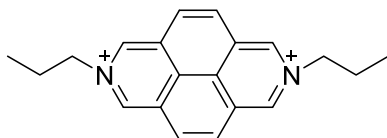

gas phase

B3LYP/6-31G(d,p)

SCF Energy (no zpe)= -884.052080 au; Energy + zpe (0K)= -884.033822 au

Enthalpy (298K)= -884.032878 au; Gibbs free energy (298K)= -884.099139 au

|   |              |              |              |
|---|--------------|--------------|--------------|
| C | -2.933573000 | 0.840376000  | 0.000191000  |
| C | -1.551232000 | 1.054739000  | 0.000104000  |
| C | -0.703058000 | -0.083886000 | 0.000015000  |
| C | -1.259206000 | -1.393569000 | -0.000024000 |
| C | -2.648903000 | -1.505161000 | 0.000041000  |
| C | -0.970715000 | 2.372601000  | 0.000112000  |
| C | 0.703059000  | 0.083887000  | -0.000040000 |
| C | 1.259206000  | 1.393569000  | 0.000010000  |
| C | 0.382793000  | 2.536374000  | 0.000080000  |
| C | 2.648904000  | 1.505161000  | -0.000009000 |
| H | 3.154333000  | 2.464107000  | 0.000041000  |
| C | 2.933574000  | -0.840376000 | -0.000146000 |
| C | 1.551233000  | -1.054739000 | -0.000132000 |
| C | 0.970715000  | -2.372601000 | -0.000197000 |
| C | -0.382792000 | -2.536374000 | -0.000148000 |
| H | -0.813091000 | -3.532536000 | -0.000205000 |
| H | 1.625379000  | -3.238036000 | -0.000297000 |
| H | -1.625379000 | 3.238037000  | 0.000160000  |
| H | -3.640060000 | 1.658057000  | 0.000191000  |
| H | -3.154333000 | -2.464106000 | 0.000048000  |
| H | 0.813092000  | 3.532536000  | 0.000110000  |
| H | 3.640061000  | -1.658056000 | -0.000219000 |
| C | 4.944724000  | 0.653756000  | -0.000065000 |
| C | 5.827010000  | -0.588437000 | 0.000002000  |
| H | 5.137932000  | 1.263832000  | 0.886775000  |
| H | 5.137956000  | 1.263753000  | -0.886953000 |
| C | 7.307218000  | -0.172666000 | -0.000010000 |

|   |              |              |              |
|---|--------------|--------------|--------------|
| H | 5.624697000  | -1.199219000 | 0.887803000  |
| H | 5.624699000  | -1.199305000 | -0.887740000 |
| H | 7.940307000  | -1.061969000 | -0.000007000 |
| H | 7.558799000  | 0.415425000  | -0.887290000 |
| H | 7.558811000  | 0.415441000  | 0.887256000  |
| C | -4.944723000 | -0.653755000 | 0.000538000  |
| C | -5.827012000 | 0.588436000  | 0.000051000  |
| H | -5.137889000 | -1.263472000 | 0.887646000  |
| H | -5.137997000 | -1.264113000 | -0.886080000 |
| C | -7.307222000 | 0.172662000  | -0.000452000 |
| H | -5.625157000 | 1.199385000  | 0.887838000  |
| H | -5.624243000 | 1.199138000  | -0.887704000 |
| H | -7.940311000 | 1.061965000  | -0.001414000 |
| H | -7.558344000 | -0.416054000 | -0.887446000 |
| H | -7.559267000 | -0.414802000 | 0.887116000  |
| N | 3.445178000  | 0.408625000  | -0.000078000 |
| N | -3.445177000 | -0.408623000 | 0.000198000  |

## 10. References

1. M. J. Frisch, G. W. Trucks, H. B. Schlegel, G. E. Scuseria, M. A. Robb, J. R. Cheeseman, J. A. Montgomery, T. Vreven, K. N. Kudin, J. C. Burant, J. M. Millam, S. S. Iyengar, J. Tomasi, V. Barone, B. Mennucci, M. Cossi, G. Scalmani, N. Rega, G. A. Petersson, H. Nakatsuji, M. Hada, M. Ehara, K. Toyota, R. Fukuda, J. Hasegawa, M. Ishida, T. Nakajima, Y. Honda, O. Kitao, H. Nakai, M. Klene, X. Li, J. E. Knox, H. P. Hratchian, J. B. Cross, V. Bakken, C. Adamo, J. Jaramillo, R. Gomperts, R. E. Stratmann, O. Yazyev, A. J. Austin, R. Cammi, C. Pomelli, J. W. Ochterski, P. Y. Ayala, K. Morokuma, G. A. Voth, P. Salvador, J. J. Dannenberg, V. G. Zakrzewski, S. Dapprich, A. D. Daniels, M. C. Strain, O. Farkas, D. K. Malick, A. D. Rabuck, K. Raghavachari, J. B. Foresman, J. V. Ortiz, Q. Cui, A. G. Baboul, S. Clifford, J. Cioslowski, B. B. Stefanov, G. Liu, A. Liashenko, P. Piskorz, I. Komaromi, R. L. Martin, D. J. Fox, T. Keith, Al M. A. Laham, C. Y. Peng, A. Nanayakkara, M. Challacombe, P. M. W. Gill, B. Johnson, W. Chen, M. W. Wong, C. Gonzalez, and J. A. Pople, Gaussian 03, Gaussian, Inc., Wallingford CT, 2004.
2. A. D. Becke, *J. Chem. Phys.*, 1993, **98**, 1372.
3. A. D. Becke, *J. Chem. Phys.*, 1993, **98**, 5648.
4. P. J. Stephens, F. J. Devlin, C. F. Chabalowski, M. J. Frisch, *J. Phys. Chem.*, 1994, **98**, 11623.
5. C. Lee, W. Yang, R. G. Parr, *Phys. Rev. B.*, 1998, **37**, 785.
